# Supplementary material
Source: PubMed Central journal article supplement (PMC5672054)
Supplement: 10.1074_M117.801514_jbc.M117.801514-1.pdf [file 10.1074_M117.801514_jbc.M117.801514-1.pdf]

## Supplemental Data

### **Mechanisms of recognition of A $\beta$ monomer, oligomer, and fibril by homologous antibodies**

**Jun Zhao<sup>1</sup>, Ruth Nussinov<sup>2,3</sup>, Buyong Ma<sup>2\*</sup>**

<sup>1</sup>Cancer and Inflammation Program, National Cancer Institute, Frederick, Maryland 21702

<sup>2</sup>Basic Science Program, Leidos Biomedical Research, Inc. Cancer and Inflammation Program, National Cancer Institute, Frederick, Maryland 21702

<sup>3</sup>Sackler Inst. of Molecular Medicine, Department of Human Genetics and Molecular Medicine, Sackler School of Medicine, Tel Aviv University, Tel Aviv 69978, Israel

\*Running title: *Amyloid Recognition by Homologous Antibodies*

\* To whom correspondence should be addressed, Buyong Ma: Tel: 301-846-6540; Fax: 301-846-5598;  
E-mail: [mabuyong@mail.nih.gov](mailto:mabuyong@mail.nih.gov)

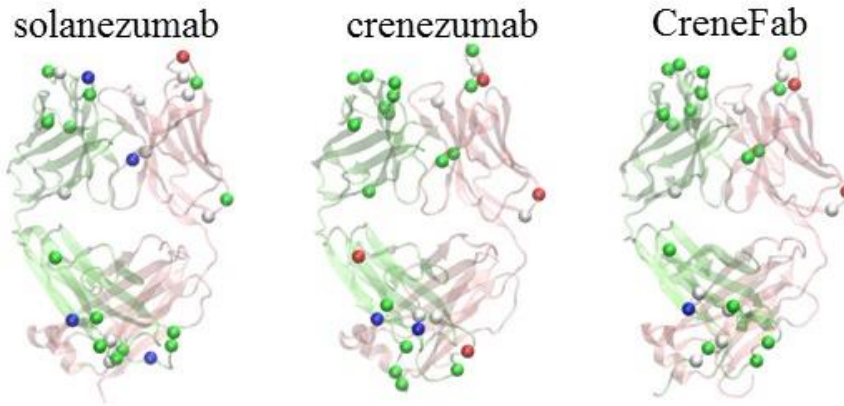

Fig. S1 Comparison of the corresponding mutational sites of the Fabs studied in this work. The light chain and heavy chain were colored in pink and lime respectively. Hydrophobic, hydrophilic, cationic, and anionic residues are colored in white, green, blue, and red respectively.

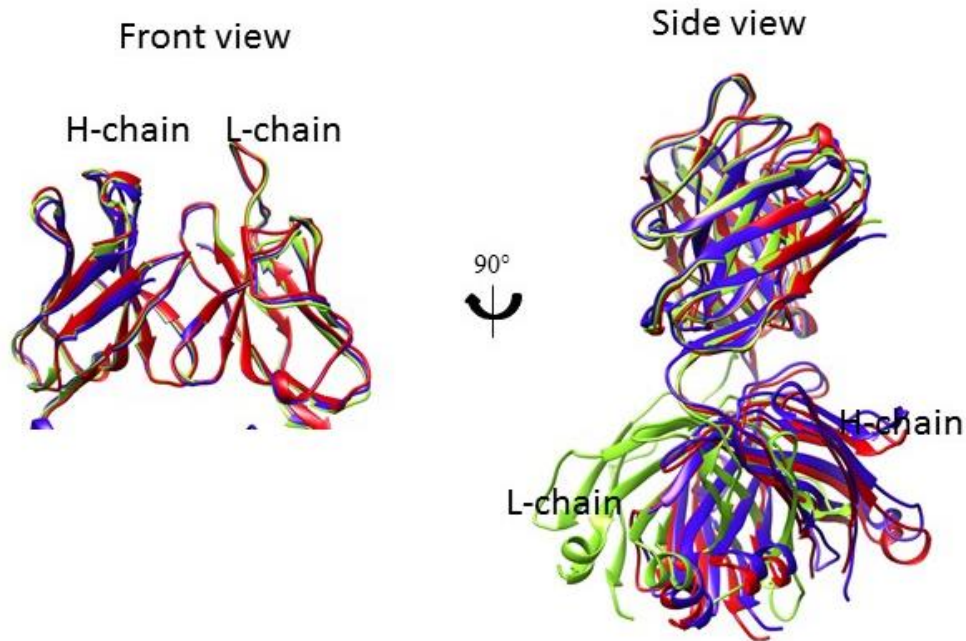

Fig. S2 Available crystal structures of solanezumab and CreneFab suggested similar V domain and different V-C domain orientation. The three crystal structures were superimposed on the V domain. The crystal structures of solanezumab-bind (4xxd), CreneFab-apo (4kmv), and CreneFab-bind (4kna) were colored by red, blue and green respectively.

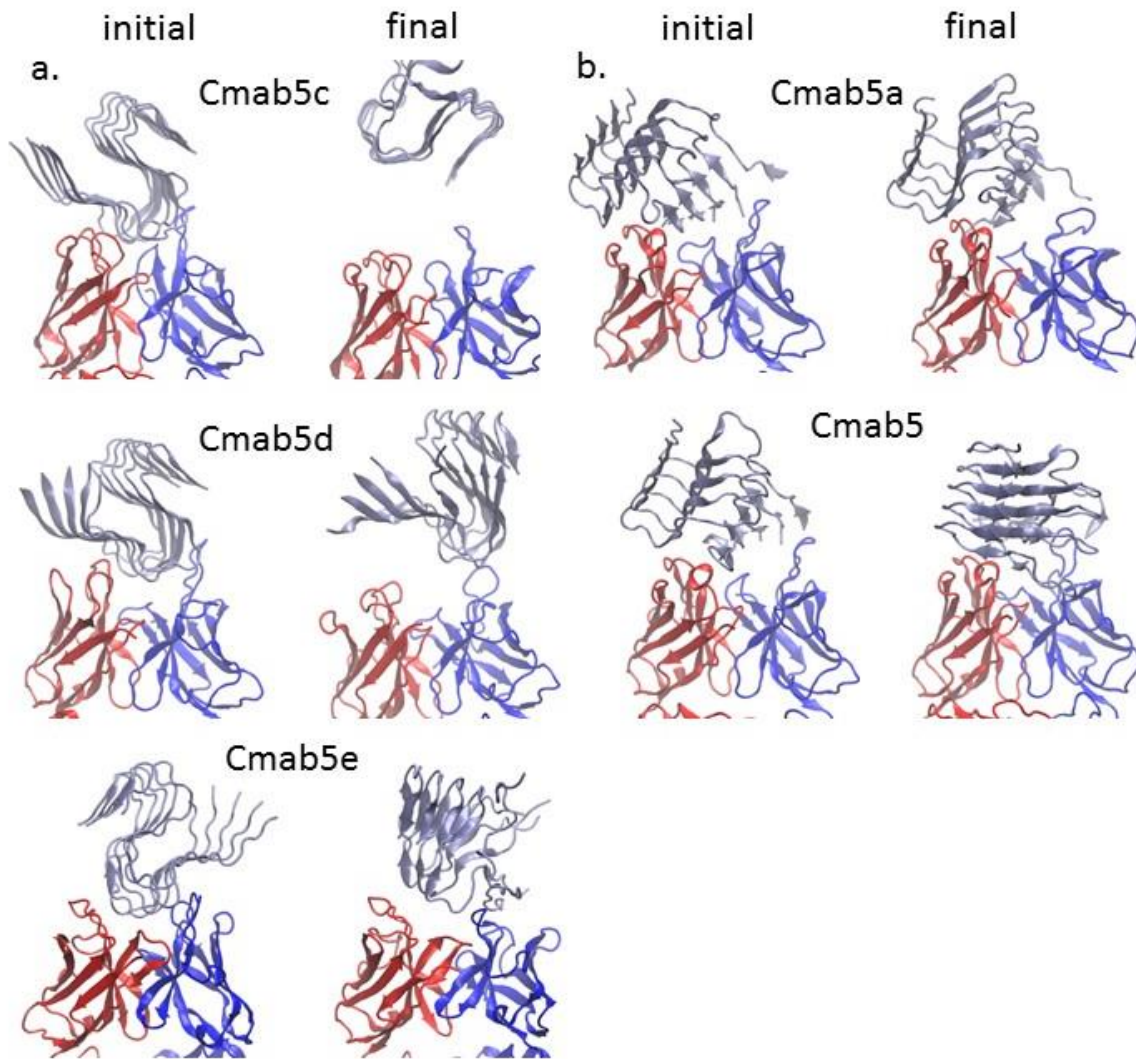

Fig. S3. Initial and final snapshots of the complexes between the A $\beta$ -5mer and crenezumab with a.21-25 and b.13-15 as epitope. Light chain, heavy chain of Fab and A $\beta$  5mer are colored by blue, red, and grey respectively.

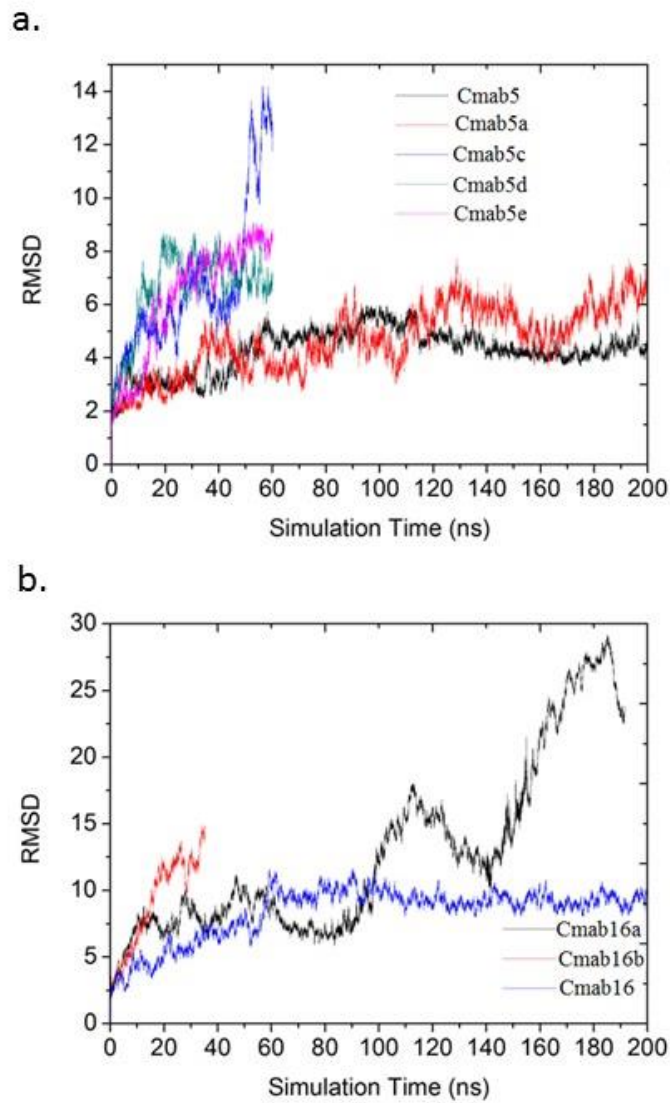

Fig. S4. RMSDs of the complexes between crenezumab and a. Aβ 5mer, b. Aβ 16mer during MD simulation.

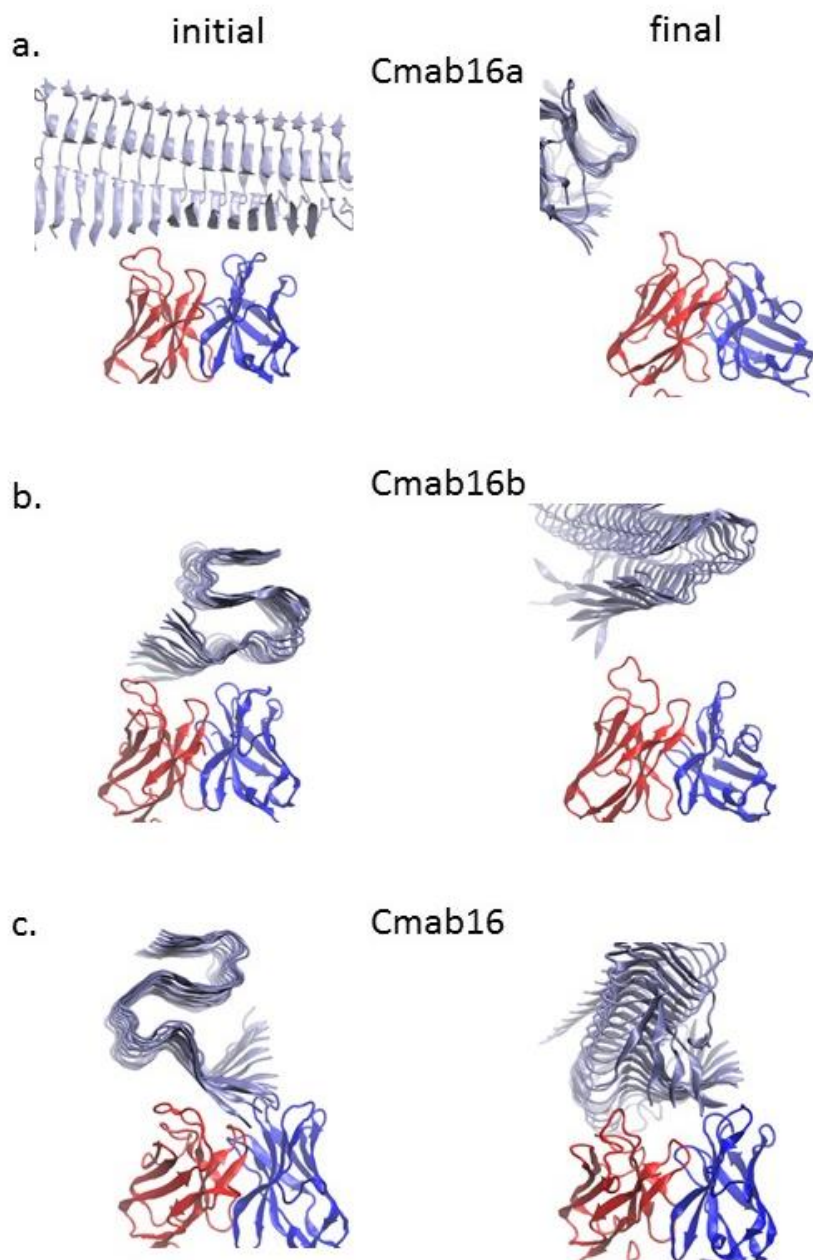

Fig. S5. Initial and final snapshots of three A $\beta$ -16mer/crenezumab complexes. Light chain, heavy chain of Fab and A $\beta$  16mer are colored by blue, red, and grey respectively.

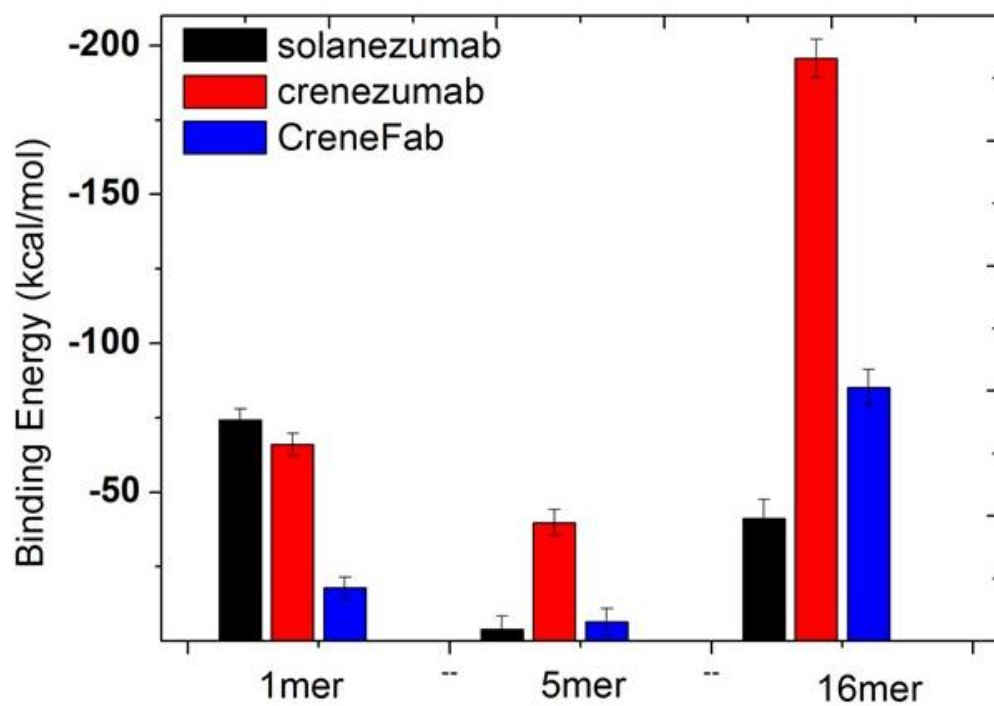

Fig. S6 Summary of the binding energies between Fabs and A $\beta$  species. Binding energies of solanezumab, crenezumab, and CreneFab are colored by black, red and blue respectively.

Table S1. Sequence alignment of light chain and heavy chain (Fab region) of Solanezumab, Crenezumab, and chimera. Identical, similar and different residues are colored by black, grey, and white separately.

|                |     |                                                                                                                                               |
|----------------|-----|-----------------------------------------------------------------------------------------------------------------------------------------------|
| Solanezumab_LC | 1   | DVVMTQSP <del>LSL</del> PVTLGQ <del>PASISCRSSQSLI</del> YSDGNA <del>YLHWFLQKPGQSPR</del>                                                      |
| Crenezumab_LC  | 1   | DIVMTQSP <del>LSL</del> PVTPGE <del>PASISCRSSQSLVYSN</del> GD <del>TYLHWYLQKPGQSPQ</del>                                                      |
| Chimera_LC     | 1   | DIVMTQSP <del>LSL</del> PVTPGE <del>PASISCRSSQSLVYSN</del> GD <del>TYLHWYLQKPGQSPQ</del>                                                      |
| Solanezumab_LC | 51  | <del>LLIYKVS</del> NRFS <del>GV</del> PDRF <del>SGSGSGTDF</del> TLKISR <del>VEAEDVGVYYCSQSTHVP</del>                                          |
| Crenezumab_LC  | 51  | <del>LLIYKVS</del> NRFS <del>GV</del> PDRF <del>SGSGSGTDF</del> TLKISR <del>VEAEDVGVYYCSQSTHVP</del>                                          |
| Chimera_LC     | 51  | <del>LLIYKVS</del> NRFS <del>GV</del> PDRF <del>SGSGSGTDF</del> TLKISR <del>VEAEDVGVYYCSQSTHVP</del>                                          |
| Solanezumab_LC | 101 | <del>WTFGQGT</del> KVEIKRTVAAPSVFIFPPSDEQLKSGTASV <del>VCLLN</del> NFYP <del>PREAK</del>                                                      |
| Crenezumab_LC  | 101 | <del>WTFGQGT</del> KVEIKRTVAAPSVFIFPPSDEQLKSGTASV <del>VCLLN</del> NFYP <del>PREAK</del>                                                      |
| Chimera_LC     | 101 | <del>WTFGQGT</del> KVEIKRTVAAPSVFIFPPSDEQLKSGTASV <del>VCLLN</del> NFYP <del>PREAK</del>                                                      |
| Solanezumab_LC | 151 | <del>VQWKVDNALQSGNSQESVTEQDSK</del> DSTYSL <del>SSTLTLSKADY</del> E <del>KHKVYACE</del>                                                       |
| Crenezumab_LC  | 151 | <del>VQWKVDNALQSGNSQESVTEQDSK</del> DSTYSL <del>SSTLTLSKADY</del> E <del>KHKVYACE</del>                                                       |
| Chimera_LC     | 151 | <del>VQWKVDNALQSGNSQESVTEQDSK</del> DSTYSL <del>SSTLTLSKADY</del> E <del>KHKVYACE</del>                                                       |
| Solanezumab_LC | 201 | <del>VTHQGLSSPVTKSFNRGEC</del>                                                                                                                |
| Crenezumab_LC  | 201 | <del>VTHQGLSSPVTKSFNRGEC</del>                                                                                                                |
| Chimera_LC     | 201 | <del>VTHQGLSSPVTKSFNRGEC</del>                                                                                                                |
| Solanezumab_HC | 220 | <del>EVQLVESGGGLVQPGGSLRLS</del> CAASGFTFSR <del>YSMSWVRQAPGKGL</del> ELVAQ                                                                   |
| Crenezumab_HC  | 220 | <del>EVQLVESGGGLVQPGGSLRLS</del> CAASGFTFSS <del>YGM</del> SWVRQAPGKGL <del>ELVAS</del>                                                       |
| Chimera_HC     | 220 | <del>EVQLVESGGGLVQPGGSLRLS</del> CAASGFTFSS <del>YGM</del> SWVRQAPGKGL <del>ELVAS</del>                                                       |
| Solanezumab_HC | 270 | <del>INSVGN</del> ST <del>YYP</del> DT <del>IV</del> KGRFTISR <del>DN</del> AKN <del>TL</del> YLQMN <del>SL</del> RAEDTAV <del>YY</del> CASGD |
| Crenezumab_HC  | 270 | <del>INSNGG</del> ST <del>YYP</del> DS <del>SV</del> KGRFTISR <del>DN</del> AKN <del>SL</del> YLQMN <del>SL</del> RAEDTAV <del>YY</del> CASGD |
| Chimera_HC     | 270 | <del>INSNGG</del> ST <del>YYP</del> DS <del>SV</del> KGRFTISR <del>DN</del> AKN <del>SL</del> YLQMN <del>SL</del> RAEDTAV <del>YY</del> CASGD |
| Solanezumab_HC | 320 | <del>YWGQGITL</del> VTVSSAST <del>KG</del> PSV <del>F</del> PLAP <del>SSK</del> STSGG <del>TAALGCLVKDYFPEPVT</del>                            |
| Crenezumab_HC  | 320 | <del>YWGQGITL</del> VTVSSAST <del>KG</del> PSV <del>F</del> PLAP <del>CSR</del> STSE <del>ST</del> AA <del>L</del> GCLVKDYFPEPVT              |
| Chimera_HC     | 320 | <del>YWGQGITL</del> VTVSSAST <del>KG</del> PSV <del>F</del> PLAP <del>SSK</del> STSGG <del>TAALGCLVKDYFPEPVT</del>                            |
| Solanezumab_HC | 370 | <del>VSWNSGALTSGVHTFPAVLQSSGLYSLSSV</del> TV <del>PSS</del> SLGTQ <del>TYI</del> C <del>NV</del> NHK                                          |
| Crenezumab_HC  | 370 | <del>VSWNSGALTSGVHTFPAVLQSSGLYSLSSV</del> TV <del>PSS</del> SLGTQ <del>KTYI</del> C <del>NV</del> DHK                                         |
| Chimera_HC     | 370 | <del>VSWNSGALTSGVHTFPAVLQSSGLYSLSSV</del> TV <del>PSS</del> SLGTQ <del>TYI</del> C <del>NV</del> NHK                                          |
| Solanezumab_HC | 420 | <del>PSNTKVDK</del> KVE <del>PK</del> SC                                                                                                      |
| Crenezumab_HC  | 420 | <del>PSNTKVDK</del> RVE <del>SK</del> YG                                                                                                      |
| Chimera_HC     | 420 | <del>PSNTKVDK</del> KVE <del>PK</del> SC                                                                                                      |

Table S2. Sequence of solanezumab and crenezumab Fab region in the numbering system of Kabat and the simulation system.

|    | Light chain |      |     |     | Heavy chain |      |     |
|----|-------------|------|-----|-----|-------------|------|-----|
|    | Kabat       | sola | cre |     | Kabat       | sola | cre |
| 1  | 1           | ASP  | ASP | 220 | 1           | GLU  | GLU |
| 2  | 2           | VAL  | ILE | 221 | 2           | VAL  | VAL |
| 3  | 3           | VAL  | VAL | 222 | 3           | GLN  | GLN |
| 4  | 4           | MET  | MET | 223 | 4           | LEU  | LEU |
| 5  | 5           | THR  | THR | 224 | 5           | VAL  | VAL |
| 6  | 6           | GLN  | GLN | 225 | 6           | GLU  | GLU |
| 7  | 7           | SER  | SER | 226 | 7           | SER  | SER |
| 8  | 8           | PRO  | PRO | 227 | 8           | GLY  | GLY |
| 9  | 9           | LEU  | LEU | 228 | 9           | GLY  | GLY |
| 10 | 10          | SER  | SER | 229 | 10          | GLY  | GLY |
| 11 | 11          | LEU  | LEU | 230 | 11          | LEU  | LEU |
| 12 | 12          | PRO  | PRO | 231 | 12          | VAL  | VAL |
| 13 | 13          | VAL  | VAL | 232 | 13          | GLN  | GLN |
| 14 | 14          | THR  | THR | 233 | 14          | PRO  | PRO |
| 15 | 15          | LEU  | PRO | 234 | 15          | GLY  | GLY |
| 16 | 16          | GLY  | GLY | 235 | 16          | GLY  | GLY |
| 17 | 17          | GLN  | GLU | 236 | 17          | SER  | SER |
| 18 | 18          | PRO  | PRO | 237 | 18          | LEU  | LEU |
| 19 | 19          | ALA  | ALA | 238 | 19          | ARG  | ARG |
| 20 | 20          | SER  | SER | 239 | 20          | LEU  | LEU |
| 21 | 21          | ILE  | ILE | 240 | 21          | SER  | SER |
| 22 | 22          | SER  | SER | 241 | 22          | CYS  | CYS |
| 23 | 23          | CYS  | CYS | 242 | 23          | ALA  | ALA |
| 24 | 24          | ARG  | ARG | 243 | 24          | ALA  | ALA |
| 25 | 25          | SER  | SER | 244 | 25          | SER  | SER |
| 26 | 26          | SER  | SER | 245 | 26          | GLY  | GLY |
| 27 | 27          | GLN  | GLN | 246 | 27          | PHE  | PHE |
| 28 | 27A         | SER  | SER | 247 | 28          | THR  | THR |
| 29 | 27B         | LEU  | LEU | 248 | 29          | PHE  | PHE |
| 30 | 27C         | ILE  | VAL | 249 | 30          | SER  | SER |
| 31 | 27D         | TYR  | TYR | 250 | 31          | ARG  | SER |
| 32 | 27E         | SER  | SER | 251 | 32          | TYR  | TYR |
| 33 | 28          | ASP  | ASN | 252 | 33          | SER  | GLY |
| 34 | 29          | GLY  | GLY | 253 | 34          | MET  | MET |
| 35 | 30          | ASN  | ASP | 254 | 35          | SER  | SER |
| 36 | 31          | ALA  | THR | 255 | 36          | TRP  | TRP |
| 37 | 32          | TYR  | TYR | 256 | 37          | VAL  | VAL |



---

|    |    |     |     |     |     |     |     |
|----|----|-----|-----|-----|-----|-----|-----|
| 38 | 33 | LEU | LEU | 257 | 38  | ARG | ARG |
| 39 | 34 | HSD | HSD | 258 | 39  | GLN | GLN |
| 40 | 35 | TRP | TRP | 259 | 40  | ALA | ALA |
| 41 | 36 | PHE | TYR | 260 | 41  | PRO | PRO |
| 42 | 37 | LEU | LEU | 261 | 42  | GLY | GLY |
| 43 | 38 | GLN | GLN | 262 | 43  | LYS | LYS |
| 44 | 39 | LYS | LYS | 263 | 44  | GLY | GLY |
| 45 | 40 | PRO | PRO | 264 | 45  | LEU | LEU |
| 46 | 41 | GLY | GLY | 265 | 46  | GLU | GLU |
| 47 | 42 | GLN | GLN | 266 | 47  | LEU | LEU |
| 48 | 43 | SER | SER | 267 | 48  | VAL | VAL |
| 49 | 44 | PRO | PRO | 268 | 49  | ALA | ALA |
| 50 | 45 | ARG | GLN | 269 | 50  | GLN | SER |
| 51 | 46 | LEU | LEU | 270 | 51  | ILE | ILE |
| 52 | 47 | LEU | LEU | 271 | 52  | ASN | ASN |
| 53 | 48 | ILE | ILE | 272 | 52A | SER | SER |
| 54 | 49 | TYR | TYR | 273 | 53  | VAL | ASN |
| 55 | 50 | LYS | LYS | 274 | 54  | GLY | GLY |
| 56 | 51 | VAL | VAL | 275 | 55  | ASN | GLY |
| 57 | 52 | SER | SER | 276 | 56  | SER | SER |
| 58 | 53 | ASN | ASN | 277 | 57  | THR | THR |
| 59 | 54 | ARG | ARG | 278 | 58  | TYR | TYR |
| 60 | 55 | PHE | PHE | 279 | 59  | TYR | TYR |
| 61 | 56 | SER | SER | 280 | 60  | PRO | PRO |
| 62 | 57 | GLY | GLY | 281 | 61  | ASP | ASP |
| 63 | 58 | VAL | VAL | 282 | 62  | THR | SER |
| 64 | 59 | PRO | PRO | 283 | 63  | VAL | VAL |
| 65 | 60 | ASP | ASP | 284 | 64  | LYS | LYS |
| 66 | 61 | ARG | ARG | 285 | 65  | GLY | GLY |
| 67 | 62 | PHE | PHE | 286 | 66  | ARG | ARG |
| 68 | 63 | SER | SER | 287 | 67  | PHE | PHE |
| 69 | 64 | GLY | GLY | 288 | 68  | THR | THR |
| 70 | 65 | SER | SER | 289 | 69  | ILE | ILE |
| 71 | 66 | GLY | GLY | 290 | 70  | SER | SER |
| 72 | 67 | SER | SER | 291 | 71  | ARG | ARG |
| 73 | 68 | GLY | GLY | 292 | 72  | ASP | ASP |
| 74 | 69 | THR | THR | 293 | 73  | ASN | ASN |
| 75 | 70 | ASP | ASP | 294 | 74  | ALA | ALA |
| 76 | 71 | PHE | PHE | 295 | 75  | LYS | LYS |
| 77 | 72 | THR | THR | 296 | 76  | ASN | ASN |
| 78 | 73 | LEU | LEU | 297 | 77  | THR | SER |
| 79 | 74 | LYS | LYS | 298 | 78  | LEU | LEU |
| 80 | 75 | ILE | ILE | 299 | 79  | TYR | TYR |

---

---

|     |     |     |     |     |     |     |     |
|-----|-----|-----|-----|-----|-----|-----|-----|
| 81  | 76  | SER | SER | 300 | 80  | LEU | LEU |
| 82  | 77  | ARG | ARG | 301 | 81  | GLN | GLN |
| 83  | 78  | VAL | VAL | 302 | 82  | MET | MET |
| 84  | 79  | GLU | GLU | 303 | 82A | ASN | ASN |
| 85  | 80  | ALA | ALA | 304 | 82B | SER | SER |
| 86  | 81  | GLU | GLU | 305 | 82C | LEU | LEU |
| 87  | 82  | ASP | ASP | 306 | 83  | ARG | ARG |
| 88  | 83  | VAL | VAL | 307 | 84  | ALA | ALA |
| 89  | 84  | GLY | GLY | 308 | 85  | GLU | GLU |
| 90  | 85  | VAL | VAL | 309 | 86  | ASP | ASP |
| 91  | 86  | TYR | TYR | 310 | 87  | THR | THR |
| 92  | 87  | TYR | TYR | 311 | 88  | ALA | ALA |
| 93  | 88  | CYS | CYS | 312 | 89  | VAL | VAL |
| 94  | 89  | SER | SER | 313 | 90  | TYR | TYR |
| 95  | 90  | GLN | GLN | 314 | 91  | TYR | TYR |
| 96  | 91  | SER | SER | 315 | 92  | CYS | CYS |
| 97  | 92  | THR | THR | 316 | 93  | ALA | ALA |
| 98  | 93  | HSD | HSD | 317 | 94  | SER | SER |
| 99  | 94  | VAL | VAL | 318 | 95  | GLY | GLY |
| 100 | 95  | PRO | PRO | 319 | 96  | ASP | ASP |
| 101 | 96  | TRP | TRP | 320 | 97  | TYR | TYR |
| 102 | 97  | THR | THR | 321 | 98  | TRP | TRP |
| 103 | 98  | PHE | PHE | 322 | 99  | GLY | GLY |
| 104 | 99  | GLY | GLY | 323 | 100 | GLN | GLN |
| 105 | 100 | GLN | GLN | 324 | 101 | GLY | GLY |
| 106 | 101 | GLY | GLY | 325 | 102 | THR | THR |
| 107 | 102 | THR | THR | 326 | 103 | LEU | THR |
| 108 | 103 | LYS | LYS | 327 | 104 | VAL | VAL |
| 109 | 104 | VAL | VAL | 328 | 105 | THR | THR |
| 110 | 105 | GLU | GLU | 329 | 106 | VAL | VAL |
| 111 | 106 | ILE | ILE | 330 | 107 | SER | SER |
| 112 | 107 | LYS | LYS | 331 | 108 | SER | SER |
| 113 | 108 | ARG | ARG | 332 | 109 | ALA | ALA |
| 114 | 109 | THR | THR | 333 | 110 | SER | SER |
| 115 | 110 | VAL | VAL | 334 | 111 | THR | THR |
| 116 | 111 | ALA | ALA | 335 | 112 | LYS | LYS |
| 117 | 112 | ALA | ALA | 336 | 113 | GLY | GLY |
| 118 | 113 | PRO | PRO | 337 | 114 | PRO | PRO |
| 119 | 114 | SER | SER | 338 | 115 | SER | SER |
| 120 | 115 | VAL | VAL | 339 | 116 | VAL | VAL |
| 121 | 116 | PHE | PHE | 340 | 117 | PHE | PHE |
| 122 | 117 | ILE | ILE | 341 | 118 | PRO | PRO |
| 123 | 118 | PHE | PHE | 342 | 119 | LEU | LEU |

---

---

|     |     |     |     |     |     |     |     |
|-----|-----|-----|-----|-----|-----|-----|-----|
| 124 | 119 | PRO | PRO | 343 | 124 | ALA | ALA |
| 125 | 120 | PRO | PRO | 344 | 125 | PRO | PRO |
| 126 | 121 | SER | SER | 345 | 126 | SER | CYS |
| 127 | 122 | ASP | ASP | 346 | 127 | SER | SER |
| 128 | 123 | GLU | GLU | 347 | 128 | LYS | ARG |
| 129 | 124 | GLN | GLN | 348 | 129 | SER | SER |
| 130 | 125 | LEU | LEU | 349 | 130 | THR | THR |
| 131 | 126 | LYS | LYS | 350 | 131 | SER | SER |
| 132 | 127 | SER | SER | 351 | 132 | GLY | GLU |
| 133 | 128 | GLY | GLY | 352 | 133 | GLY | SER |
| 134 | 129 | THR | THR | 353 | 134 | THR | THR |
| 135 | 130 | ALA | ALA | 354 | 135 | ALA | ALA |
| 136 | 131 | SER | SER | 355 | 132 | ALA | ALA |
| 137 | 132 | VAL | VAL | 356 | 133 | LEU | LEU |
| 138 | 133 | VAL | VAL | 357 | 134 | GLY | GLY |
| 139 | 134 | CYS | CYS | 358 | 135 | CYS | CYS |
| 140 | 135 | LEU | LEU | 359 | 136 | LEU | LEU |
| 141 | 136 | LEU | LEU | 360 | 137 | VAL | VAL |
| 142 | 137 | ASN | ASN | 361 | 138 | LYS | LYS |
| 143 | 138 | ASN | ASN | 362 | 139 | ASP | ASP |
| 144 | 139 | PHE | PHE | 363 | 140 | TYR | TYR |
| 145 | 140 | TYR | TYR | 364 | 141 | PHE | PHE |
| 146 | 141 | PRO | PRO | 365 | 142 | PRO | PRO |
| 147 | 142 | ARG | ARG | 366 | 143 | GLU | GLU |
| 148 | 143 | GLU | GLU | 367 | 144 | PRO | PRO |
| 149 | 144 | ALA | ALA | 368 | 145 | VAL | VAL |
| 150 | 145 | LYS | LYS | 369 | 146 | THR | THR |
| 151 | 146 | VAL | VAL | 370 | 147 | VAL | VAL |
| 152 | 147 | GLN | GLN | 371 | 148 | SER | SER |
| 153 | 148 | TRP | TRP | 372 | 149 | TRP | TRP |
| 154 | 149 | LYS | LYS | 373 | 150 | ASN | ASN |
| 155 | 150 | VAL | VAL | 374 | 151 | SER | SER |
| 156 | 151 | ASP | ASP | 375 | 152 | GLY | GLY |
| 157 | 152 | ASN | ASN | 376 | 153 | ALA | ALA |
| 158 | 153 | ALA | ALA | 377 | 154 | LEU | LEU |
| 159 | 154 | LEU | LEU | 378 | 155 | THR | THR |
| 160 | 155 | GLN | GLN | 379 | 156 | SER | SER |
| 161 | 156 | SER | SER | 380 | 157 | GLY | GLY |
| 162 | 157 | GLY | GLY | 381 | 158 | VAL | VAL |
| 163 | 158 | ASN | ASN | 382 | 159 | HSD | HSD |
| 164 | 159 | SER | SER | 383 | 160 | THR | THR |
| 165 | 160 | GLN | GLN | 384 | 161 | PHE | PHE |
| 166 | 161 | GLU | GLU | 385 | 162 | PRO | PRO |

---

---

|     |     |     |     |     |     |     |     |
|-----|-----|-----|-----|-----|-----|-----|-----|
| 167 | 162 | SER | SER | 386 | 163 | ALA | ALA |
| 168 | 163 | VAL | VAL | 387 | 164 | VAL | VAL |
| 169 | 164 | THR | THR | 388 | 165 | LEU | LEU |
| 170 | 165 | GLU | GLU | 389 | 166 | GLN | GLN |
| 171 | 166 | GLN | GLN | 390 | 167 | SER | SER |
| 172 | 167 | ASP | ASP | 391 | 168 | SER | SER |
| 173 | 168 | SER | SER | 392 | 169 | GLY | GLY |
| 174 | 169 | LYS | LYS | 393 | 170 | LEU | LEU |
| 175 | 170 | ASP | ASP | 394 | 171 | TYR | TYR |
| 176 | 171 | SER | SER | 395 | 172 | SER | SER |
| 177 | 172 | THR | THR | 396 | 173 | LEU | LEU |
| 178 | 173 | TYR | TYR | 397 | 174 | SER | SER |
| 179 | 174 | SER | SER | 398 | 175 | SER | SER |
| 180 | 175 | LEU | LEU | 399 | 176 | VAL | VAL |
| 181 | 176 | SER | SER | 400 | 177 | VAL | VAL |
| 182 | 177 | SER | SER | 401 | 178 | THR | THR |
| 183 | 178 | THR | THR | 402 | 179 | VAL | VAL |
| 184 | 179 | LEU | LEU | 403 | 180 | PRO | PRO |
| 185 | 180 | THR | THR | 404 | 181 | SER | SER |
| 186 | 181 | LEU | LEU | 405 | 182 | SER | SER |
| 187 | 182 | SER | SER | 406 | 183 | SER | SER |
| 188 | 183 | LYS | LYS | 407 | 184 | LEU | LEU |
| 189 | 184 | ALA | ALA | 408 | 185 | GLY | GLY |
| 190 | 185 | ASP | ASP | 409 | 186 | THR | THR |
| 191 | 186 | TYR | TYR | 410 | 187 | GLN | LYS |
| 192 | 187 | GLU | GLU | 411 | 188 | THR | THR |
| 193 | 188 | LYS | LYS | 412 | 189 | TYR | TYR |
| 194 | 189 | HSD | HSD | 413 | 190 | ILE | THR |
| 195 | 190 | LYS | LYS | 414 | 191 | CYS | CYS |
| 196 | 191 | VAL | VAL | 415 | 192 | ASN | ASN |
| 197 | 192 | TYR | TYR | 416 | 193 | VAL | VAL |
| 198 | 193 | ALA | ALA | 417 | 194 | ASN | ASP |
| 199 | 194 | CYS | CYS | 418 | 195 | HSD | HSD |
| 200 | 195 | GLU | GLU | 419 | 196 | LYS | LYS |
| 201 | 196 | VAL | VAL | 420 | 197 | PRO | PRO |
| 202 | 197 | THR | THR | 421 | 198 | SER | SER |
| 203 | 198 | HSD | HSD | 422 | 199 | ASN | ASN |
| 204 | 199 | GLN | GLN | 423 | 200 | THR | THR |
| 205 | 200 | GLY | GLY | 424 | 201 | LYS | LYS |
| 206 | 201 | LEU | LEU | 425 | 202 | VAL | VAL |
| 207 | 202 | SER | SER | 426 | 203 | ASP | ASP |
| 208 | 203 | SER | SER | 427 | 204 | LYS | LYS |
| 209 | 204 | PRO | PRO | 428 | 205 | LYS | ARG |

---

---

|     |     |     |     |     |     |     |     |
|-----|-----|-----|-----|-----|-----|-----|-----|
| 210 | 205 | VAL | VAL | 429 | 206 | VAL | VAL |
| 211 | 206 | THR | THR | 430 | 211 | GLU | GLU |
| 212 | 207 | LYS | LYS | 431 | 212 | PRO | SER |
| 213 | 208 | SER | SER | 432 | 213 | LYS | LYS |
| 214 | 209 | PHE | PHE | 433 | 214 | SER | TYR |
| 215 | 210 | ASN | ASN | 434 | 215 | CYS | GLY |
| 216 | 211 | ARG | ARG |     |     |     |     |
| 217 | 212 | GLY | GLY |     |     |     |     |
| 218 | 213 | GLU | GLU |     |     |     |     |
| 219 | 214 | CYS | CYS |     |     |     |     |

---

Table S3 RMSD (Å) of the three crystal structures by comparing of full mab, V domain and C domain using Pymol align module.

|          | 5kmv-5kna | 5kmv-4xxd | 5kna -4xxd |
|----------|-----------|-----------|------------|
| Full mab | 4.045     | 1.304     | 3.173      |
| V domain | 0.575     | 0.792     | 0.680      |
| C domain | 0.382     | 0.625     | 0.612      |

Table S4. Surface area of the antibody-antigen interface of selected complexes.

| Antibody   | # of chains | <sup>1</sup> S <sub>t</sub> | <sup>2</sup> S <sub>LC</sub> | <sup>2</sup> S <sub>HC</sub> | <sup>3</sup> H-bonds |     |     | <sup>3</sup> hydrophobic |     |     | <sup>3</sup> electrostatic |     |     |
|------------|-------------|-----------------------------|------------------------------|------------------------------|----------------------|-----|-----|--------------------------|-----|-----|----------------------------|-----|-----|
| sola       | 1mer        | 1889.7                      | 39.8%                        | 60.2%                        | 10.6                 | 1.4 | 9.2 | 5.9                      | 3.9 | 2   | 1.3                        | 0   | 1.3 |
|            | 5mer        | 1456.8                      | 38.6%                        | 61.4%                        | 9.2                  | 5   | 4.2 | 8.2                      | 0.1 | 8.2 | 2.1                        | 1.2 | 0.8 |
|            | 16mer       | 1818.7                      | 42.8%                        | 57.2%                        | 14.6                 | 7.7 | 6.9 | 0                        | 0   | 0   | 4.7                        | 3.5 | 1.2 |
| Crenezumab | 1mer        | 1785.2                      | 51.7%                        | 48.3%                        | 7.0                  | 1.4 | 5.6 | 7.2                      | 4.1 | 3.1 | 1                          | 0   | 1   |
|            | 5mer        | 1505.5                      | 46.7%                        | 53.3%                        | 13.8                 | 7.2 | 6.6 | 0.6                      | 0.3 | 0.3 | 2.1                        | 1.1 | 0.9 |
|            | 16mer       | 1667.3                      | 34.1%                        | 65.9%                        | 9.2                  | 2.1 | 7.1 | 0                        | 0   | 0   | 1.6                        | 1   | 0.6 |
| chimera    | 1mer        | 1989.2                      | 55.4%                        | 44.6%                        | 9.9                  | 2.0 | 8.0 | 8.4                      | 5.0 | 3.4 | 1                          | 0   | 1   |
|            | 5mer        | 1724.5                      | 39.3%                        | 60.7%                        | 9.4                  | 6.4 | 3   | 7.6                      | 1   | 6.6 | 2.4                        | 2.4 | 0   |
|            | 16mer       | 887.1                       | 6%                           | 94%                          | 5.2                  | 0.2 | 5   | 0                        | 0   | 0   | 0                          | 0   | 0   |

<sup>1</sup>. Total interface area.

<sup>2</sup>. Percentage of the surface area between light chain/heavy chain and A $\beta$ .

<sup>3</sup>. H-bonds, hydrophobic and electrostatic interactions are listed in total, with light chain and heavy chain respectively.

Table S5. Contacts change between solanezumab and crenezumab in complex with A $\beta$ 12-28 Monomer.

| Res# <sup>1</sup> | Res# <sup>2</sup> | Resname <sup>3</sup> | Contact | Resname <sup>4</sup> | Contact | $\Delta$ contact <sup>5</sup> |
|-------------------|-------------------|----------------------|---------|----------------------|---------|-------------------------------|
| 250 <sup>6</sup>  | 31 <sup>H</sup>   | ARG                  | 2.15    | SER                  | 0       | 2.15                          |
| 54                | 49 <sup>L</sup>   | TYR                  | 2.4     | TYR                  | 0.86    | 1.54                          |
| 220               | 1 <sup>H</sup>    | GLU                  | 0.98    | GLU                  | 0.05    | 0.93                          |
| 252 <sup>6</sup>  | 33 <sup>H</sup>   | SER                  | 2.78    | GLY                  | 1.85    | 0.93                          |
| 41 <sup>6</sup>   | 36 <sup>L</sup>   | PHE                  | 0.89    | TYR                  | 0       | 0.89                          |
| 61                | 56 <sup>L</sup>   | SER                  | 1.07    | SER                  | 0.24    | 0.83                          |
| 272               | 52A <sup>H</sup>  | SER                  | 1.18    | SER                  | 0.37    | 0.81                          |
| 39                | 34 <sup>L</sup>   | HIS                  | 0.79    | HIS                  | 0       | 0.79                          |
| 317               | 94 <sup>H</sup>   | SER                  | 1.92    | SER                  | 1.13    | 0.79                          |
| 251               | 32 <sup>H</sup>   | TYR                  | 3.9     | TYR                  | 3.12    | 0.78                          |
| 221               | 2 <sup>H</sup>    | VAL                  | 1.05    | VAL                  | 0.4     | 0.65                          |
| 320               | 97 <sup>H</sup>   | TYR                  | 2.14    | TYR                  | 1.53    | 0.61                          |
| 318               | 95 <sup>H</sup>   | GLY                  | 1.39    | GLY                  | 0.88    | 0.51                          |
| 96                | 91 <sup>L</sup>   | SER                  | 1.19    | SER                  | 1.69    | 0.5                           |
| 254               | 35 <sup>H</sup>   | SER                  | 0.31    | SER                  | 0.77    | 0.46                          |
| 31                | 27D <sup>L</sup>  | TYR                  | 0.2     | TYR                  | 0.64    | 0.44                          |
| 319               | 96 <sup>H</sup>   | ASP                  | 2.42    | ASP                  | 2       | 0.42                          |
| 101               | 96 <sup>L</sup>   | TRP                  | 1.28    | TRP                  | 1.69    | 0.41                          |
| 62                | 57 <sup>L</sup>   | GLY                  | 0.39    | GLY                  | 0       | 0.39                          |
| 51                | 46 <sup>L</sup>   | LEU                  | 0.94    | LEU                  | 0.55    | 0.39                          |
| 245               | 26 <sup>H</sup>   | GLY                  | 0.36    | GLY                  | 0       | 0.36                          |
| 269 <sup>6</sup>  | 76 <sup>H</sup>   | GLN                  | 0.76    | SER                  | 0.45    | 0.31                          |
| 271               | 52 <sup>H</sup>   | ASN                  | 0.93    | ASN                  | 0.67    | 0.26                          |
| 99                | 94 <sup>L</sup>   | VAL                  | 0.27    | VAL                  | 0.52    | 0.25                          |

1. Residue number in the MD simulation.
2. Residue number in the Kabat sequence numbering.
3. The residue names in solanezumab
4. The residue names in crenezumab.
5. Contact difference between the specific residue in solanezumab and crenezumab. Only residues with  $\Delta$ contact > 0.25 were listed
6. The residues at this site is different between solanezumab and crenezumab.



Table S6. Details about the simulation systems in the search of A $\beta$  5mer/16mer- Crenezumab complexes

| Model   | Antibody   | Antigen                  | epitope | Total atoms | Cations | Anion | water | Time (ns) | E <sub>Binding</sub> |
|---------|------------|--------------------------|---------|-------------|---------|-------|-------|-----------|----------------------|
| Cmab5a  | Crenezumab | A $\beta$ 11-42 pentamer | 13-15   | 227351      | 209     | 206   | 72695 | 100       | -37.2 $\pm$ 4.5      |
| Cmab5   | Crenezumab | A $\beta$ 11-42 pentamer | 13-15   | 192947      | 176     | 173   | 61249 | 200       | -39.8 $\pm$ 4.4      |
| Cmab5c  | Crenezumab | A $\beta$ 11-42 pentamer | 21-25   | 206592      | 190     | 187   | 65788 | 100       | 2.4 $\pm$ 4.5        |
| Cmab5d  | Crenezumab | A $\beta$ 11-42 pentamer | 21-25   | 192978      | 176     | 174   | 61264 | 60        | 28.7 $\pm$ 4.4       |
| Cmab5e  | Crenezumab | A $\beta$ 11-42 pentamer | 21-25   | 196838      | 180     | 178   | 62548 | 60        | 78.2 $\pm$ 4.3       |
| Cmab16a | Crenezumab | A $\beta$ 11-42 16mer    | 13-15   | 286697      | 266     | 252   | 90690 | 100       | 54.3 $\pm$ 6         |
| Cmab16b | Crenezumab | A $\beta$ 11-42 16mer    | 13-15   | 222443      | 203     | 189   | 69314 | 80        | 139.2 $\pm$ 6.2      |
| Cmab16  | Crenezumab | A $\beta$ 11-42 16mer    | 13-15   | 286625      | 266     | 252   | 90666 | 100       | -195.8 $\pm$ 6.3     |

Table S7. Contacts change between solanezumab and crenezumab in complex with A $\beta$ 5mer/16mer.

|      | Res# <sup>1</sup> | Res# <sup>2</sup> | solanezumab     |         | crenezumab |         | $\Delta$ contact <sup>3</sup> |
|------|-------------------|-------------------|-----------------|---------|------------|---------|-------------------------------|
|      |                   |                   | Resname         | Contact | Resname    | Contact |                               |
| 5mer | 32                | 27E <sup>L</sup>  | SER             | 0       | SER        | 2.84    | 2.84                          |
|      | 247               | 28 <sup>H</sup>   | THR             | 0       | THR        | 2.33    | 2.33                          |
|      | 251               | 32 <sup>H</sup>   | TYR             | 0       | TYR        | 1.96    | 1.96                          |
|      | 31                | 27D <sup>L</sup>  | TYR             | 0       | TYR        | 1.84    | 1.84                          |
|      | 250 <sup>4</sup>  | 31 <sup>H</sup>   | ARG             | 2.2     | SER        | 4.02    | 1.82                          |
|      | 33                | 28 <sup>L</sup>   | ASP             | 0.09    | ASN        | 1.84    | 1.75                          |
|      | 272               | 52A <sup>H</sup>  | SER             | 0       | SER        | 0.99    | 0.99                          |
|      | 319               | 96 <sup>H</sup>   | ASP             | 0       | ASP        | 0.89    | 0.89                          |
|      | 61                | 56 <sup>L</sup>   | SER             | 0       | SER        | 0.88    | 0.88                          |
|      | 59                | 54 <sup>L</sup>   | ARG             | 0       | ARG        | 0.8     | 0.8                           |
|      | 34                | 29 <sup>L</sup>   | GLY             | 0       | GLY        | 0.58    | 0.58                          |
|      | 62                | 57 <sup>L</sup>   | GLY             | 0       | GLY        | 0.54    | 0.54                          |
|      | 37                | 32 <sup>L</sup>   | TYR             | 0       | TYR        | 0.43    | 0.43                          |
|      | 16mer             | 247               | 28 <sup>H</sup> | THR     | 0          | THR     | 2.06                          |
| 35   |                   | 30 <sup>L</sup>   | ASN             | 0.04    | ASP        | 1.8     | 1.76                          |
| 249  |                   | 30 <sup>H</sup>   | SER             | 0.11    | SER        | 1.3     | 1.19                          |
| 220  |                   | 1 <sup>H</sup>    | GLU             | 0       | GLU        | 1.01    | 1.01                          |
| 34   |                   | 29 <sup>L</sup>   | GLY             | 0.1     | GLY        | 0.89    | 0.79                          |
| 276  |                   | 56 <sup>H</sup>   | SER             | 0.96    | SER        | 1.6     | 0.64                          |
| 273  |                   | 53 <sup>H</sup>   | VAL             | 0.92    | ASN        | 1.53    | 0.61                          |
| 33   |                   | 28 <sup>L</sup>   | ASP             | 0.75    | ASN        | 1.34    | 0.59                          |
| 37   |                   | 32 <sup>L</sup>   | TYR             | 0.02    | TYR        | 0.54    | 0.52                          |
| 98   |                   | 93 <sup>L</sup>   | HIS             | 0.01    | HIS        | 0.31    | 0.3                           |
| 61   |                   | 56 <sup>L</sup>   | SER             | 0       | SER        | 0.25    | 0.25                          |
| 319  |                   | 96 <sup>H</sup>   | ASP             | 0.95    | ASP        | 0.4     | -0.55                         |
| 250  |                   | 31 <sup>H</sup>   | ARG             | 3.28    | SER        | 2.88    | -0.4                          |

1. Residue number in the MD simulation.
2. Residue number in the Kabat sequence numbering.
3. Contact difference between the specific residue in solanezumab and crenezumab. Only residues with  $\Delta$ contact > 0.25 were listed
4. The residues at this site is different between solanezumab and crenezumab.

Table S8. The shortest distance from distant sites to Phe20 of peptide in the Fab/A $\beta$  monomer complex.

| <sup>1</sup> Res # | name                 | chain | Phe20 |      | Lys16   |
|--------------------|----------------------|-------|-------|------|---------|
|                    |                      |       | solan | cren | chimera |
| 205                | <sup>2</sup> GLY/GLY | L     | 485   | 432  | n/a     |
| 347                | LYS/ARG              | H     | 525   | 388  | n/a     |
| 410                | GLN/LYS              | H     | 333   | 275  | n/a     |
| 351                | GLY/GLU              | H     | 449   | 330  | n/a     |
| 352                | GLY/SER              | H     | 389   | 328  | n/a     |
| 413                | ILE/THR              | H     | 305   | 262  | n/a     |
| 417                | ASN/ASP              | H     | 280   | 239  | n/a     |
| 428                | LYS/ARG              | H     | 313   | 269  | n/a     |
| 431                | PRO/SER              | H     | 406   | 366  | n/a     |
| 433                | SER/TYR              | H     | 472   | 442  | n/a     |
| 434                | CYS/GLY              | H     | 461   | n/a  | n/a     |

1. Residue number in the MD simulation.

2. The two residues indicated that there is mutation between sola and cre. The first residue is in solanezumab and the second one is in crenezumab.

Table S9. Details about the simulated antibody-antigen complexes.

| Model   | Antibody              | Antigen                  | Template<br>pdb | Total<br>atoms | Water/Cation/Anion | Time<br>(ns) |
|---------|-----------------------|--------------------------|-----------------|----------------|--------------------|--------------|
| Smab0   | Solanezumab           | N/A                      | 4xxd            | 99926          | 31084/85/91        | 200          |
| Smab1   | Solanezumab           | A $\beta$ 12-28 monomer  | 4xxd            | 132308         | 41766/116/122      | 200          |
| Smab5   | Solanezumab           | A $\beta$ 11-42 pentamer | 4xxd            | 227351         | 72695/209/206      | 200          |
| Smab16  | Solanezumab           | A $\beta$ 11-42 16mer    | 4xxd            | 286625         | 90666/266/252      | 200          |
| Cmab0a  | Crenezumab            | N/A                      | 5kmv            | 97092          | 30153/85/87        | 100          |
| Cmab0b  | Crenezumab            | N/A                      | 5kna            | 91058          | 28144/79/81        | 100          |
| Cmab1   | Crenezumab            | A $\beta$ 12-28 monomer  | 5kna            | 112141         | 35067/99/101       | 100          |
| Cmab5   | Crenezumab            | A $\beta$ 11-42 pentamer | 5kna            | 201298         | 64025/185/182      | 200          |
| Cmab16  | Crenezumab            | A $\beta$ 11-42 16mer    | 5kna            | 247395         | 77613/228/214      | 200          |
| CHmab0a | Crenezumab<br>chimera | N/A                      | 5kmv            | 143623         | 45609/129/132      | 100          |
| CHmab0b | Crenezumab<br>chimera | N/A                      | 5kna            | 102520         | 31934/90/93        | 100          |
| CHmab1  | Crenezumab<br>chimera | A $\beta$ 12-28 monomer  | 5kna            | 124916         | 39294/111/114      | 100          |
| CHmab5  | Crenezumab<br>chimera | A $\beta$ 11-42 pentamer | 5kna            | 206839         | 65846/189/187      | 200          |
| CHmab16 | Crenezumab<br>chimera | A $\beta$ 11-42 16mer    | 5kna            | 258732         | 81521/238/226      | 200          |
